# Supplementary material for: Highly ordered bimolecular crystalline blends for low-noise and high-detectivity polymeric photodiodes
Source: Royal Society of Chemistry journal article supplement (doi:10.1039/c6tc03325c), 2016-01-01
Supplement: c6tc03325c1.pdf [file c6tc03325c1.pdf]

## Supporting Information

### Highly-ordered bimolecular crystalline blends for low-noise and high-detectivity polymeric photodiodes

Kyu Min Sim, Seongwon Yoon, and Dae Sung Chung,\*

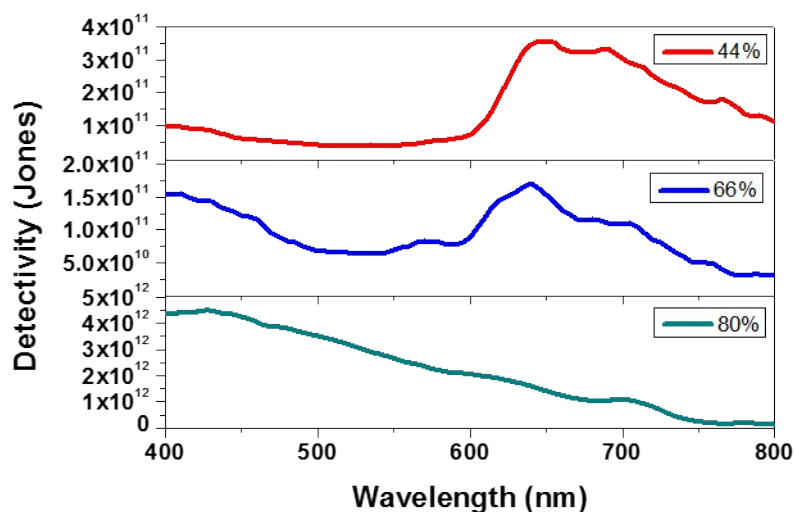

**Figure S1** The dark current-based detectivity of the OPDs under reverse bias voltage of 5 V with various composition ratios.

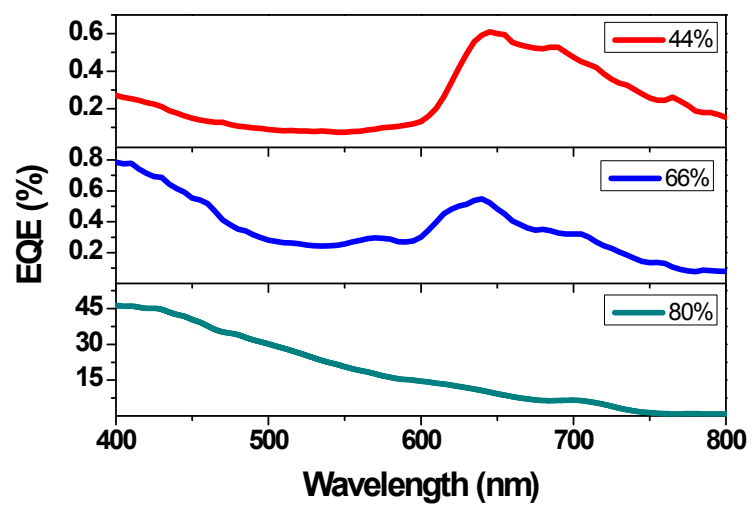

**Figure S2** The External quantum efficiency of the OPDs under reverse bias voltage of 5 V with various composition ratios.
